# Supplementary material for: Fast and accurate branch lengths estimation for phylogenomic trees
Source: PubMed Central journal article supplement (PMC4705742; doi:10.1186/s12859-015-0821-8), 2016-01-07
Supplement: 12859_2015_821_MOESM2_ESM.pdf [file 12859_2015_821_MOESM2_ESM.pdf]

## Additional file 2 — The choice of $Z_k$ in the constraint

While testing ERaBLE we have realised that setting  $Z_k = 1$  or  $Z_k = N_k$ , for all  $k \in \{1, 2, \dots, m\}$  can cause important overestimations of the scale factors  $\hat{\alpha}_k$  for genes only present in a small group of closely related taxa. This phenomenon is strictly linked to the strong underestimation of a minority of gene rates — and the slight overestimation of the majority of gene rates — observed for SDM-based methods, which also use the constraint with  $Z_k = 1$ . In our experiments we have set  $Z_k = N_k \sum_{i,j \in L_k} \delta_{ij}^{(k)}$ , which largely solves this problem, despite being rather heuristic. In this additional file, we show the importance of the constraint used by ERaBLE with a very simple example.

We construct a small data set consisting of just two nucleotide alignments, those of exons ENSG00000066654\_THUMPDI\_000 and ENSG00000127423\_AUNIP\_000 obtained from OrthoMaM after trimAl filtering. We call them  $G_1$  and  $G_2$ , respectively. For simplicity we only keep the sequences of six species, those in the set  $L = \{Gorilla, Homo, Pan, Bos, Erinaceus, Sorex\}$ . Since  $G_1$  is only sampled in primates, we have  $L_1 = \{Gorilla, Homo, Pan\}$ , and  $L_2 = L$ . Alignment lengths are  $N_1 = 489$  for  $G_1$ , and  $N_2 = 855$  for  $G_2$ . Figure 7 shows a phylogenetic tree for these data.

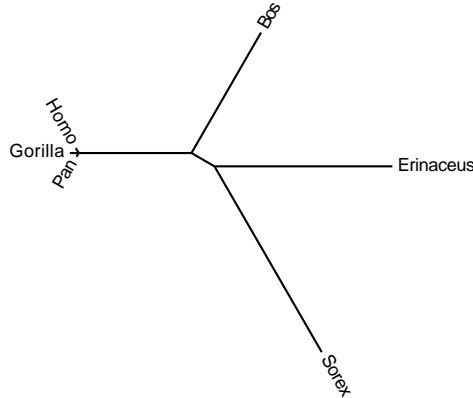

Figure 7 – Maximum likelihood tree (PhyML with model TN93+ $\Gamma_8$ ) obtained on the concatenation of the two alignments in the example.

Fig. 8 shows the distance matrices estimated for  $G_1$  and  $G_2$  (left column), and the different behaviours of ERaBLE with  $Z_k = 1$  and  $Z_k = N_k \sum_{i,j \in L_k} \delta_{ij}^{(k)}$  (middle and right column, respectively). The behaviour for  $Z_k = N_k$  is similar to that for  $Z_k = 1$ , and not shown here for brevity. A quick comparison of  $\Delta_1$  and  $\Delta_2$  suggests that the rate of  $G_1$  is higher than that of  $G_2$  (note that, in two cases out of three,  $\delta_{ij}^{(1)}$  is more than the double than  $\delta_{ij}^{(2)}$ ). We then expect that  $\hat{\alpha}_1 < \hat{\alpha}_2$ . However, when  $Z_k = 1$ , the opposite happens: solving problem (6) leads to  $\hat{\alpha}_1 = 1.73$  and  $\hat{\alpha}_2 = 0.274$ .

The key observation to understand why this happens is that  $\Delta_1$  only contains very closely related species (all great apes, see also Fig. 7), so its distances are very small relative to many of those in  $\Delta_2$ , which can be up to about 30 times larger. As a consequence, if  $\hat{\alpha}_1 \leq \hat{\alpha}_2$  the value of the objective function  $Q(\hat{\alpha}, \hat{b})$  is dominated by the differences  $\hat{\alpha}_2 \delta_{ij}^{(2)} - \hat{d}_{ij}$ , that is, the difference between  $\hat{\alpha}_2 \Delta_2$  and  $\hat{D} = (\hat{d}_{ij})$ . It is then intuitive that a way to reduce  $Q(\hat{\alpha}, \hat{b})$  is to simultaneously reduce the scale of  $\hat{\alpha}_2 \Delta_2$  and  $\hat{D} = (\hat{d}_{ij})$ , which can be achieved by decreasing the value of  $\hat{\alpha}_2$  (and consequently increasing that of  $\hat{\alpha}_1$ , given that for  $Z_k = 1$  their mean is constrained to be 1).

This is precisely what is happening when setting  $Z_k = 1$  in our example (middle column in Fig. 8): instead of having  $\hat{\alpha}_1 < \hat{\alpha}_2$ , ERaBLE produces a small  $\hat{\alpha}_2 = 0.274$  and a large  $\hat{\alpha}_1 = 1.73$ . Compared to the alternative constraint (right column), where we have  $\hat{\alpha}_1 < \hat{\alpha}_2$  as expected, it is clear that this results

| Input distances |            |       |            |         |       | Trivial constraint $Z_k = 1$ |                           |       |                           |       |      | Our constraint $Z_k = N_k \sum_{i,j \in L_k} \delta_{ij}^{(k)}$ |                           |         |                           |      |      |
|-----------------|------------|-------|------------|---------|-------|------------------------------|---------------------------|-------|---------------------------|-------|------|-----------------------------------------------------------------|---------------------------|---------|---------------------------|------|------|
|                 |            |       |            |         |       | $\hat{\alpha}_1$             | $\hat{\alpha}_2$          |       |                           |       |      | $\hat{\alpha}_1$                                                | $\hat{\alpha}_2$          |         |                           |      |      |
|                 |            |       |            |         |       | 1.73                         | .274                      |       |                           |       |      | 0.538                                                           | 1.00                      |         |                           |      |      |
|                 | Homo       | Pan   | Bos        | Erinac. | Sorex | Homo                         | Pan                       | Bos   | Erinac.                   | Sorex | Homo | Pan                                                             | Bos                       | Erinac. | Sorex                     |      |      |
| Gorilla         | .0203      | .0135 | $\Delta_1$ |         |       | Gorilla                      | .0351                     | .0233 | $\hat{\alpha}_1 \Delta_1$ |       |      | Gorilla                                                         | .0109                     | .0073   | $\hat{\alpha}_1 \Delta_1$ |      |      |
| Homo            | .0148      |       |            |         |       | Homo                         | .0256                     |       |                           |       |      | Homo                                                            | .0080                     |         |                           |      |      |
| Gorilla         | .0087      | .0099 | .278       | .354    | .432  | Gorilla                      | .0024                     | .0028 | .0763                     | .0970 | .118 | Gorilla                                                         | .0087                     | .0099   | .278                      | .354 | .432 |
| Homo            | .0062      |       | .279       | .342    | .432  | Homo                         | .0017                     |       | .0766                     | .0937 | .118 | Homo                                                            | .0062                     |         | .279                      | .342 | .432 |
| Pan             |            |       | .286       | .345    | .429  | Pan                          |                           |       | .0783                     | .0945 | .118 | Pan                                                             |                           |         | .286                      | .345 | .429 |
| Bos             |            |       | .419       |         | .422  | Bos                          |                           |       | .115                      |       | .116 | Bos                                                             |                           |         | .419                      |      | .422 |
| Erinac.         | $\Delta_2$ |       | .446       |         |       | Erinac.                      | $\hat{\alpha}_2 \Delta_2$ |       | .122                      |       |      | Erinac.                                                         | $\hat{\alpha}_2 \Delta_2$ |         | .446                      |      |      |
| Gorilla         |            |       |            |         |       | Gorilla                      | .0127                     | .0117 | .0777                     | .0985 | .116 | Gorilla                                                         | .0087                     | .0099   | .284                      | .360 | .424 |
| Homo            |            |       |            |         |       | Homo                         | .0104                     |       | .0774                     | .0983 | .116 | Homo                                                            | .0069                     |         | .280                      | .357 | .420 |
| Pan             |            |       |            |         |       | Pan                          |                           |       | .0764                     | .0973 | .115 | Pan                                                             |                           |         | .282                      | .358 | .422 |
| Bos             |            |       |            |         |       | Bos                          |                           |       | .107                      |       | .124 | Bos                                                             |                           |         | .390                      |      | .454 |
| Erinac.         |            |       |            |         |       | Erinac.                      | $\hat{D}$                 |       |                           |       |      | Erinac.                                                         | $\hat{D}$                 |         |                           |      |      |
|                 |            |       |            |         |       |                              |                           |       |                           |       |      |                                                                 |                           |         |                           |      |      |

Figure 8 – **Changing behaviour of ERaBLE with different constraints.** In this example, ERaBLE is run on the two distance matrices  $\Delta_1$  and  $\Delta_2$  on the left. Setting  $Z_k = 1$  results in the  $\hat{\alpha}_k$  values and matrices  $\hat{\alpha}_1 \Delta_1$ ,  $\hat{\alpha}_2 \Delta_2$  and  $\hat{D} = (\hat{d}_{ij})$  in the middle column. Our chosen setting for  $Z_k$  results in more reasonable values for these quantities (right column), as explained in the text.

in significantly smaller differences  $\hat{\alpha}_2 \delta_{ij}^{(2)} - \hat{d}_{ij}$  for most distances, the only exceptions being the three distances between primates. Note that the scale of  $\hat{\alpha}_2 \Delta_2$  cannot be reduced indefinitely, as then the scale of  $\hat{\alpha}_1 \Delta_1$  becomes too large, and the fit of  $\hat{D}$  with the distances between primates in the two rescaled distance matrices becomes too loose (note that for  $Z_k = 1$  the distances between primates in  $\hat{\alpha}_1 \Delta_1$  and  $\hat{\alpha}_2 \Delta_2$  already differ by an order of magnitude and the fit with  $\hat{D}$  is very poor).

The, admittedly heuristic, approach that we have adopted in our experiments, that is, setting  $Z_k = N_k \sum_{i,j \in L_k} \delta_{ij}^{(k)}$ , essentially prevents the genes only appearing in few and closely related taxa from having an influence on the constraint. Thus, it is the  $\hat{\alpha}_k$  for the remaining genes that are constrained to have a weighted average of 1 (where the weight depends on the length of their sequence, as in equation (5)). As a consequence, these  $\hat{\alpha}_k$  cannot be reduced together with  $\hat{D}$ , as we showed for  $Z_k = 1$ . In our example, the new constraint is  $24 \cdot \hat{\alpha}_1 + 3838 \cdot \hat{\alpha}_2 = 3862$ , which is roughly equivalent to imposing  $\hat{\alpha}_2 = 1$ . The results are then much more realistic than with  $Z_k = 1$ : for example the rescaled matrices  $\hat{\alpha}_1 \Delta_1$  and  $\hat{\alpha}_2 \Delta_2$  are now much closer on their common entries (right column in Fig. 8).
