# Supplementary material for: Fast and accurate branch lengths estimation for phylogenomic trees
Source: PubMed Central journal article supplement (PMC4705742; doi:10.1186/s12859-015-0821-8), 2016-01-07
Supplement: 12859_2015_821_MOESM3_ESM.pdf [file 12859_2015_821_MOESM3_ESM.pdf]

## Additional file 3 — Estimation accuracy measures

We adopted two different measures of estimation accuracy, one for branch lengths and the other for gene rates.

- The fraction of variance unexplained is a classical measure in regression analysis which can be seen as a normalised form of the sum of squared errors of prediction of an estimation model. Here, we adapt it to measure the discrepancy between a vector of branch lengths ( $b_e$ ) and their estimates ( $\hat{b}_e$ ). We define the *fraction of variance unexplained* of ( $b_e$ ) relative to ( $\hat{b}_e$ ) as:

$$\frac{\sum_e (b_e - \hat{b}_e)^2}{\sum_e (b_e - \bar{b})^2}$$

where sums are over all branches in a tree and  $\bar{b}$  is the arithmetic mean of the branch lengths in ( $b_e$ ).

- In order to measure the discrepancy between a collection of  $m$  gene rates ( $r_k$ ) and their estimates ( $\hat{r}_k$ ), we take the *mean absolute log-ratio* between  $r_k$  and  $\hat{r}_k$ , that is:

$$\frac{1}{m} \sum_{k=1}^m \left| \log \frac{\hat{r}_k}{r_k} \right|.$$
