# Supplementary material for: Fast and accurate branch lengths estimation for phylogenomic trees
Source: PubMed Central journal article supplement (PMC4705742; doi:10.1186/s12859-015-0821-8), 2016-01-07
Supplement: 12859_2015_821_MOESM5_ESM.pdf [file 12859_2015_821_MOESM5_ESM.pdf]

## Additional file 5 — Reference topology for the OrthoMaM data set

For the OrthoMaM data set, the reference topology follows the Atlantogenata hypothesis (e.g., [Morgan et al. 2013]) and the Laurasiatheria intra-order placements of Romiguier et al. [Romiguier et al. 2013]. In Newick format this topology is given by:

```
(Ornithorhynchus,((((((((Mus,Rattus),Dipodomys),Cavia),Ictidomys),(Ochotona,Oryctolagus)),
(((Otolemur,Microcebus),(Tarsius,(Callithrix,(Macaca,(Nomascus,(Pongo,(Gorilla,(Pan,Homo))))))
))))),Tupaia),((((((Felis,(Canis,(Ailuropoda,Mustela))),Equus),(Myotis,Pteropus)),
(((Bos,Tursiops),Sus),Vicugna),(Sorex,Erinaceus)),((Loxodonta,Procavia),Echinops),
(Dasyopus,Choloepus))),Monodelphis,(Macropus,Sarcophilus))));
```

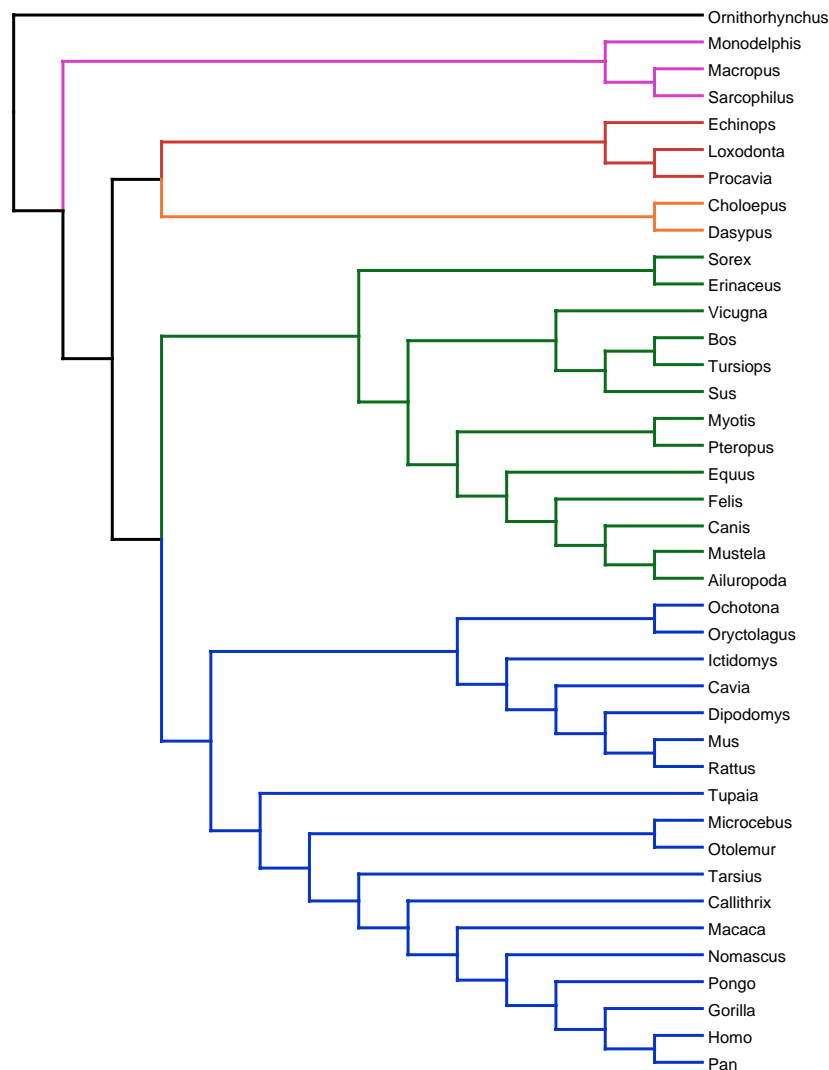

Figure 10 – OrthoMaM data set reference topology.

[Morgan et al. 2013] C. C. Morgan, P. G. Foster, A. E. Webb, D. Pisani, J. O. McInerney, and M. J. O’Connell, “Heterogeneous models place the root of the placental mammal phylogeny,” *Molecular biology and evolution*, vol. 30, no. 9, pp. 2145–2156, 2013.

[Romiguier et al. 2013] J. Romiguier, V. Ranwez, F. Delsuc, N. Galtier, and E. J. Douzery, “Less is more in mammalian phylogenomics: At-rich genes minimize tree conflicts and unravel the root of placental mammals,” *Molecular biology and evolution*, vol. 30, no. 9, pp. 2134–2144, 2013.
